# Supplementary material
Source: PubMed Central journal article supplement (PMC3220482)
Supplement: supp_M111.274902_jbc.M111.274902-1.pdf [file supp_M111.274902_jbc.M111.274902-1.pdf]

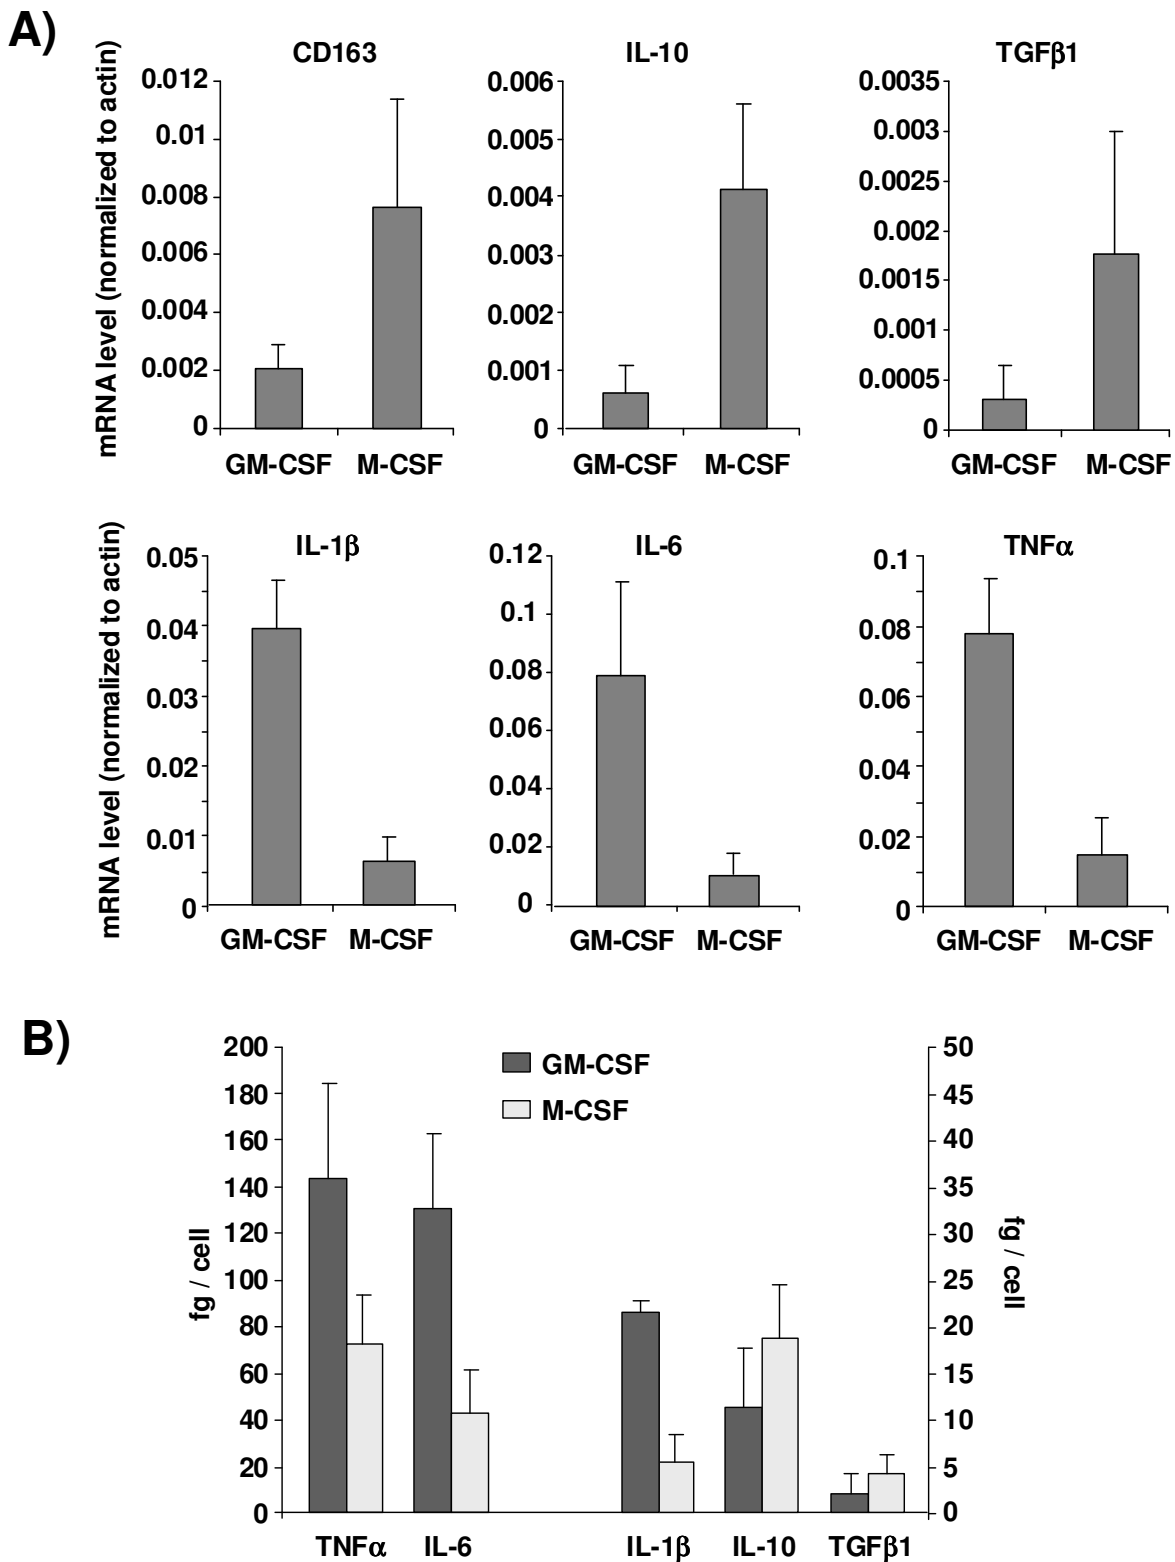

**Figure 1. Cytokine expression of macrophages generated from GM-CSF and M-CSF treated monocytes. A)** Total RNA was submitted to reverse transcription and real time PCR, or **B)** culture supernatants were analysed by ELISA. **A)** The amount of CD163, IL-6, TNF $\alpha$ , IL-1 $\beta$ , IL-10 and TGF $\beta$ 1 mRNA was normalized to actin. The mean values  $\pm$  SD of five independent analyses are shown. **B)** The protein amount of IL-6, TNF $\alpha$ , IL-1 $\beta$ , IL-10 and TGF $\beta$ 1 was normalized to cell number. The mean values  $\pm$  SD of three independent experiments are shown.
