# Supplementary material
Source: PubMed Central journal article supplement (PMC3220482)
Supplement: supp_M111.274902_jbc.M111.274902-2.pdf [file supp_M111.274902_jbc.M111.274902-2.pdf]

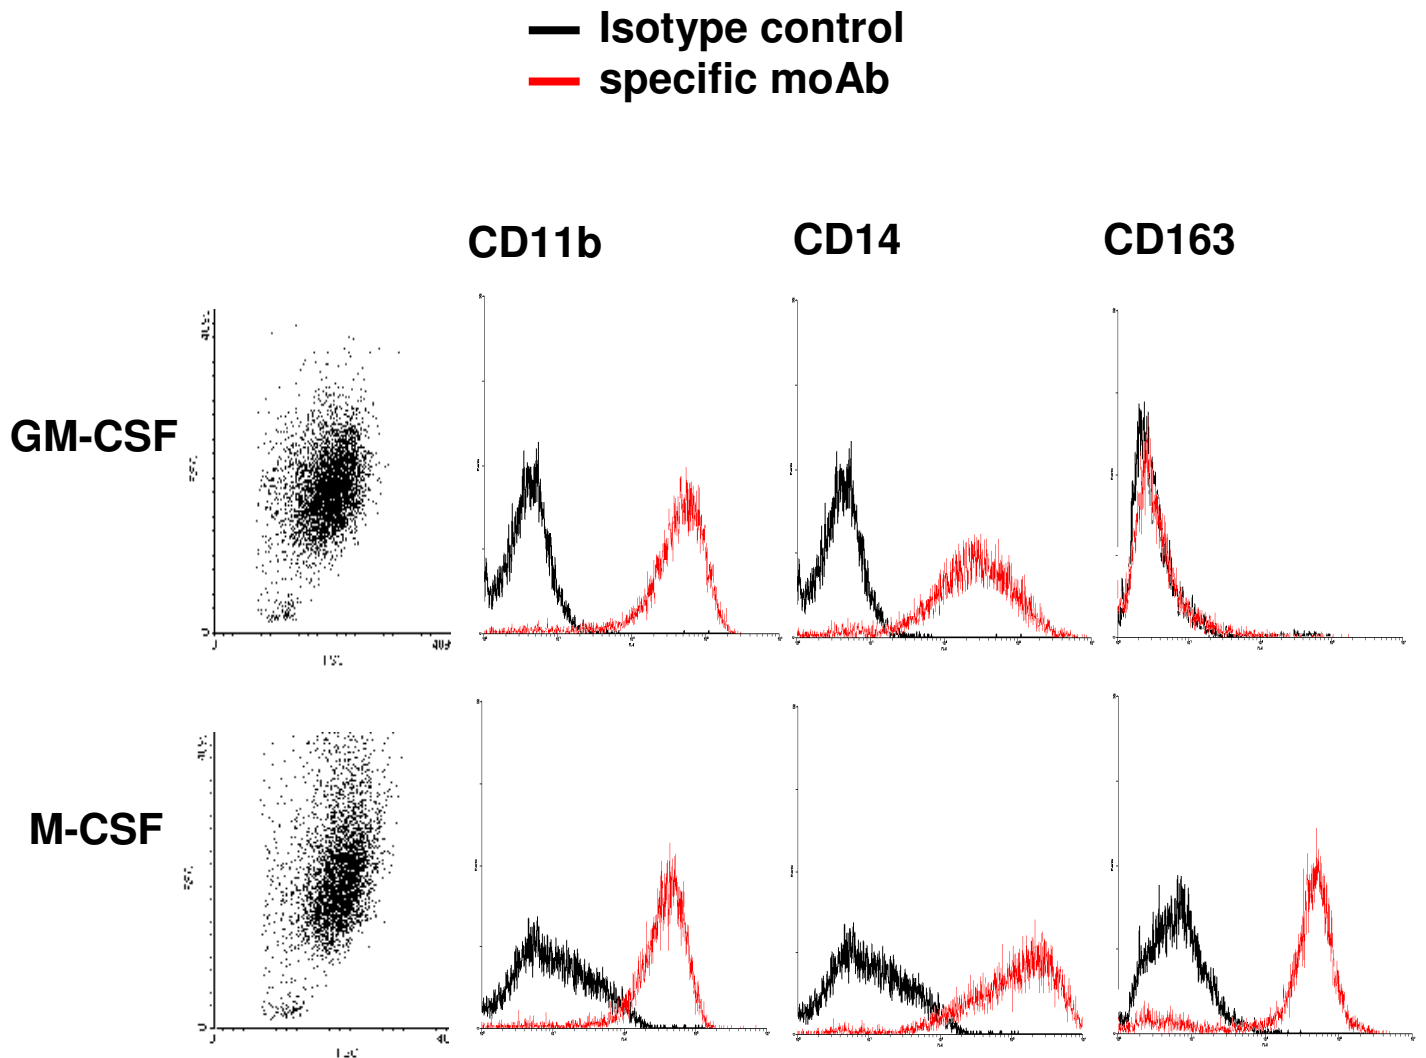

**Figure 2. Surface marker expression of macrophages generated from GM-CSF and M-CSF treated monocytes.** Cells were immunostained for the indicated marker proteins and analysed by flow cytometry. A representative result of five independent experiments is shown.
