# Supplementary material
Source: PubMed Central journal article supplement (PMC3220482)
Supplement: supp_M111.274902_jbc.M111.274902-3.pdf [file supp_M111.274902_jbc.M111.274902-3.pdf]

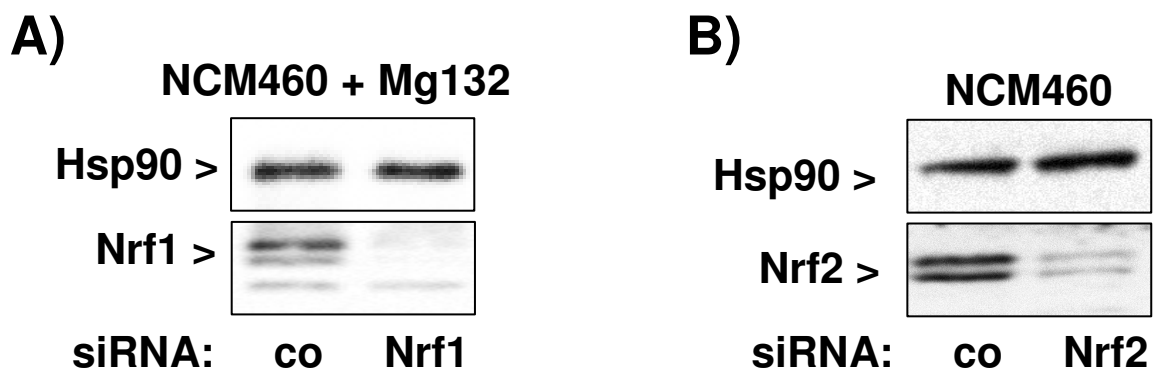

**Figure 3. siRNA mediated knock down of Nrf1 and Nrf2 expression.** NCM460 cells were transfected **A)** either with control and Nrf1 siRNA, or **B)** with control and Nrf2 siRNA. Twenty four hours later, siRNA transfected cells were **A)** treated with 5  $\mu$ M of the proteasome inhibitor Mg132 for 16h, or were **B)** left untreated. Then total cellular extracts were collected and submitted to westernblotting for the detection of **A)** Nrf1 or **B)** for Nrf2. Hsp90 staining was used as loading control. Representative results from two independent experiments are shown.

**Supplementary figure 3**
