# Supplementary material
Source: PubMed Central journal article supplement (PMC3220482)
Supplement: supp_M111.274902_jbc.M111.274902-4.pdf [file supp_M111.274902_jbc.M111.274902-4.pdf]

## Supplementary material

### Additional methods

**RNA preparation and real-time PCR.** Isolation of total RNA and reverse-transcription into single-stranded cDNA was carried out as described (27). cDNA was subjected to real-time PCR (iCycler; BioRad) using the SYBR-Green assay with gene-specific primers at a final concentration of 0.2  $\mu$ M. For characterization of GM-CSF and M-CSF macrophages the following primer sequences were used: IL-6 *forward*: 5'-TTCTCCACAAGCGCCTTCGGT-3', *reverse*: 5'-GTCTCCTTTCTCAGGGCTGAG-3'; IL-1 $\beta$  *forward*: 5'-AGTGCTCCTTCCAGGACCTGGA-3', *reverse*: 5'-CACTCTCCAGCTGTAGAGTGG-3'; TNF- $\alpha$  *forward*: 5'-GAAAGCATGATCCGGGACGTGGA-3', *reverse*: 5'-TGGCAGGGGCTCTTGATGGCAGA-3'; IL-10 *forward*: 5'-AGAACAGCTGCACCCACTTC-3', *reverse*: 5'-CGCCTTGATGTCTGGGTCTT-3'; TGF- $\beta$ 1 *forward*: 5'-ACCATGCCGCCCTCCGGG-3', *reverse*: 5'-TCAGCTGCACTTGCAGGAGC-3'; CD163 *forward*: 5'-ACTTGAAGACTCTGGATCTGCT-3', *reverse*: 5'-CTGGTGACAAAACAGGCACTG-3'; GAPDH *forward*: 5'-TCCATGACAACTTTGGTATCGTGG-3', *reverse*: 5'-GACGCCTGCTTCACCACCTTCT-3'. Data were collected during annealing steps and were further analysed by using the iCycler iQ optical system software (BioRad).

**Staining and flow cytometric analysis of macrophages.** After differentiation of macrophages in the presence of GM-CSF or M-CSF, cells were stained for CD11b, CD14 and CD163. For this purpose,  $1 \times 10^6$  cells of each macrophage population were washed in staining buffer (PBS+ 0.5 % BSA + 2 mM EDTA) before incubation in FcR blocking reagent (1:10 diluted in staining buffer) (Miltenyi Biotec, Bergisch Gladbach, Germany) for 15 minutes in the refrigerator. Then, cells were divided and either incubated with 10  $\mu$ l of a rat IgG2b PE-conjugated anti-CD11b antibody (Miltenyi Biotec), 10  $\mu$ l of a mouse IgG2a PE-conjugated anti-CD14 antibody (Miltenyi Biotec), 20  $\mu$ l of a mouse IgG1 PE-conjugated anti-CD163 antibody (BD Pharmingen, Heidelberg, Germany) or the respective isotype control antibodies (Miltenyi Biotec, BD Pharmingen), each diluted in 100  $\mu$ l staining buffer

containing FcR blocking reagent and incubated for 10 minutes on ice. After washing in staining buffer, cells were collected in 200  $\mu$ l staining buffer and analysed by a FACS Calibur (BD Biosciences, Heidelberg, Germany) using the CellQuest Software.
